# Supplementary material
Source: PubMed Central journal article supplement (PMC3664337)
Supplement: supp_kws391_kws391_Web_Tables.pdf [file supp_kws391_kws391_Web_Tables.pdf]

**Urinary bisphenol A and obesity in U.S. children**

**Web Tables**

Web Table 1. Association between urinary BPA levels and obesity in children, adding higher order polynomial term, National Health and Nutrition Examination Survey, 2003–2008

| BPA Quartiles <sup>a</sup> | Sample size | Weighted % | Multivariable adjusted OR <sup>b</sup> |            |
|----------------------------|-------------|------------|----------------------------------------|------------|
|                            |             |            | OR                                     | 95% CI     |
| Quartile 1                 | 547         | 10.0       | 1                                      | Referent   |
| Quartile 2                 | 544         | 20.9       | 2.37                                   | 1.57, 3.57 |
| Quartile 3                 | 556         | 16.8       | 1.80                                   | 1.14, 2.84 |
| Quartile 4                 | 553         | 22.9       | 2.58                                   | 1.66, 4.00 |
| P for trend                |             |            | 0.0019                                 |            |
| Log BPA                    | 2200        | 17.7       | 1.25                                   | 1.10, 1.43 |

Abbreviations: BPA, Urinary bisphenol A; CI, confidence interval; OR, odds ratio

<sup>a</sup> BPA quartiles: quartile 1 (<1.5 ng/mL), quartile 2 (1.5-2.7 ng/mL), quartile 3 (2.8-5.4 ng/mL), quartile 4 (>5.4 ng/mL)

<sup>b</sup> Adjusted for age (years), sex (boys, girls), race/ethnicity (non-Hispanic white, non-Hispanic black, Mexican American, other), education (below high school, high school, above high school), moderate activity (absent, present), urinary creatinine (mg/dL), and serum cotinine (ng/mL).

Web Table 2. Association between urinary BPA levels and obesity in children, by pre- and post-puberty, National Health and Nutrition Examination Survey, 2003–2008

| BPA Quartiles <sup>a</sup> | Pre-puberty (6-11 years) |            |                           |            | Post-puberty (12-18 years) |            |                                        |            |
|----------------------------|--------------------------|------------|---------------------------|------------|----------------------------|------------|----------------------------------------|------------|
|                            | Sample size              | Weighted % | Multivariable adjusted OR |            | Sample size                | Weighted % | Multivariable adjusted OR <sup>b</sup> |            |
|                            |                          |            | OR                        | 95% CI     |                            |            | OR                                     | 95% CI     |
| Quartile 1                 | 219                      | 10.4       | 1                         | Referent   | 328                        | 9.7        | 1                                      | Referent   |
| Quartile 2                 | 200                      | 20.0       | 2.13                      | 1.28, 3.54 | 344                        | 21.6       | 2.44                                   | 1.25, 4.75 |
| Quartile 3                 | 212                      | 18.1       | 1.69                      | 0.91, 3.14 | 344                        | 15.8       | 1.69                                   | 0.79, 3.59 |
| Quartile 4                 | 208                      | 24.8       | 2.30                      | 1.26, 4.18 | 345                        | 21.4       | 2.47                                   | 1.34, 4.55 |
| P for trend                |                          |            | 0.0455                    |            |                            |            | 0.0378                                 |            |
| Log BPA                    | 839                      | 18.3       | 1.25                      | 1.04, 1.49 | 1361                       | 17.3       | 1.20                                   | 1.00, 1.43 |

Abbreviations: BPA, Urinary bisphenol A; CI, confidence interval; OR, odds ratio

<sup>a</sup> BPA quartiles: quartile 1 (<1.5 ng/mL), quartile 2 (1.5-2.7 ng/mL), quartile 3 (2.8-5.4 ng/mL), quartile 4 (>5.4 ng/mL)

<sup>b</sup> Adjusted for race/ethnicity (non-Hispanic white, non-Hispanic black, Mexican American, other), education (below high school, high school, above high school), moderate activity (absent, present), urinary creatinine (mg/dL), and serum cotinine (ng/mL);

p-interaction = 0.4058

Web Table 3. Demographic characteristics of the all NHANES children and NHANES children included in this study, National Health and Nutrition Examination Survey, 2003–2008

| Characteristics           | NHANES children in the study<br>(n=2200 <sup>a</sup> ) |            | All NHANES children<br>(n==6559 <sup>a</sup> ) |            |
|---------------------------|--------------------------------------------------------|------------|------------------------------------------------|------------|
|                           | %                                                      | Mean (SE)  | %                                              | Mean (SE)  |
| Age, years                |                                                        | 12.3 ± 0.1 |                                                | 12.3 ± 0.1 |
| Women                     | 48.5                                                   |            | 47.9                                           |            |
| Race/ethnicity            |                                                        |            |                                                |            |
| Non-Hispanic white        | 62.4                                                   |            | 61.2                                           |            |
| Non-Hispanic black        | 14.4                                                   |            | 14.7                                           |            |
| Mexican American          | 12.5                                                   |            | 12.7                                           |            |
| Other                     | 10.7                                                   |            | 11.4                                           |            |
| Parent/guardian education |                                                        |            |                                                |            |
| Below high school         | 20.1                                                   |            | 19.6                                           |            |
| High school               | 24.5                                                   |            | 25.7                                           |            |
| Above high school         | 55.4                                                   |            | 54.6                                           |            |
| BMI, kg/m <sup>2</sup>    |                                                        | 21.3 ± 0.2 |                                                | 21.3 ± 0.2 |
| Annual household income   |                                                        |            |                                                |            |
| Under \$25,000            | 23.2                                                   |            | 23.6                                           |            |
| \$25,000 to \$54,999      | 29.0                                                   |            | 28.3                                           |            |
| \$55,000 and over         | 47.8                                                   |            | 48.1                                           |            |

Abbreviations: BMI, Body mass index; SE, Standard error

<sup>a</sup> Un-weighted sample size

Web Table 4. Association between urinary BPA levels and obesity in children, by gender-specific BPA quartiles, National Health and Nutrition Examination Survey, 2003–2008

| BPA Quartiles <sup>a</sup> | Girls       |            |                           |            | Boys        |            |                                        |            |
|----------------------------|-------------|------------|---------------------------|------------|-------------|------------|----------------------------------------|------------|
|                            | Sample size | Weighted % | Multivariable adjusted OR |            | Sample size | Weighted % | Multivariable adjusted OR <sup>b</sup> |            |
|                            |             |            | OR                        | 95% CI     |             |            | OR                                     | 95% CI     |
| Quartile 1                 | 265         | 11.0       | 1                         | Referent   | 282         | 9.2        | 1                                      | Referent   |
| Quartile 2                 | 279         | 19.5       | 1.76                      | 1.00, 3.10 | 265         | 22.4       | 2.98                                   | 1.70, 5.23 |
| Quartile 3                 | 270         | 14.7       | 1.18                      | 0.59, 2.37 | 289         | 19.0       | 2.40                                   | 1.48, 3.87 |
| Quartile 4                 | 270         | 18.8       | 1.59                      | 0.94, 2.69 | 280         | 26.4       | 3.61                                   | 2.09, 6.24 |
| P for trend                |             |            | 0.3689                    |            |             |            | 0.0004                                 |            |
| Log BPA                    | 1084        | 16.1       | 1.03                      | 0.85, 1.23 | 1116        | 19.2       | 1.42                                   | 1.19, 1.70 |

Abbreviations: BPA, Urinary bisphenol A; CI, confidence interval; OR, odds ratio

<sup>a</sup> BPA quartiles:

Girls: quartile 1 (<1.5 ng/mL), quartile 2 (1.5-2.7 ng/mL), quartile 3 (2.8-5.3 ng/mL), quartile 4 (>5.3 ng/mL)

Boys: quartile 1 (<1.5 ng/mL), quartile 2 (1.5-2.7 ng/mL), quartile 3 (2.8-5.5 ng/mL), quartile 4 (>5.5 ng/mL)

<sup>b</sup> Adjusted for age (years), race/ethnicity (non-Hispanic white, non-Hispanic black, Mexican American, other), education (below high school, high school, above high school), moderate activity (absent, present), urinary creatinine (mg/dL), and serum cotinine (ng/mL).

Web Table 5. Association between urinary BPA levels and obesity in children, by race/ethnicity-specific BPA quartiles, National Health and Nutrition Examination Survey, 2003–2008

| BPA Quartiles <sup>a</sup> | Non-white   |            |                           |            | White       |            |                                        |             |
|----------------------------|-------------|------------|---------------------------|------------|-------------|------------|----------------------------------------|-------------|
|                            | Sample size | Weighted % | Multivariable adjusted OR |            | Sample size | Weighted % | Multivariable adjusted OR <sup>b</sup> |             |
|                            |             |            | OR                        | 95% CI     |             |            | OR                                     | 95% CI      |
| Quartile 1                 | 399         | 18.1       | 1                         | Referent   | 160         | 5.1        | 1                                      | Referent    |
| Quartile 2                 | 398         | 22.3       | 1.14                      | 0.75, 1.73 | 153         | 20.8       | 5.10                                   | 2.02, 12.91 |
| Quartile 3                 | 391         | 24.8       | 1.26                      | 0.87, 1.82 | 157         | 13.7       | 3.06                                   | 1.15, 8.17  |
| Quartile 4                 | 388         | 24.9       | 1.21                      | 0.79, 1.86 | 154         | 20.3       | 4.93                                   | 1.97, 12.35 |
| P for trend                |             |            | 0.3555                    |            |             |            | 0.0036                                 |             |
| Log BPA                    | 1576        | 22.4       | 1.05                      | 0.91, 1.22 | 624         | 14.8       | 1.46                                   | 1.17, 1.84  |

Abbreviations: BPA, Urinary bisphenol A; CI, confidence interval; OR, odds ratio

<sup>a</sup> BPA quartiles:

Non-white: quartile 1 (<1.5 ng/mL), quartile 2 (1.5-2.7 ng/mL), quartile 3 (2.8-5.4 ng/mL), quartile 4 (>5.4 ng/mL)

White: quartile 1 (<1.6 ng/mL), quartile 2 (1.6-2.9 ng/mL), quartile 3 (3.0-5.7 ng/mL), quartile 4 (>5.7 ng/mL)

<sup>b</sup> Adjusted for age (years), sex (boys, girls), education (below high school, high school, above high school), moderate activity (absent, present), urinary creatinine (mg/dL), and serum cotinine (ng/mL).

Web Table 6. Association between urinary BPA levels and obesity in children: Prevalence Proportion Ratios, National Health and Nutrition Examination Survey, 2003–2008

| BPA Quartiles <sup>a</sup> | Sample size | Weighted % | Age, sex adjusted hazard ratio |            | Multivariable adjusted hazard ratio <sup>b</sup> |            |
|----------------------------|-------------|------------|--------------------------------|------------|--------------------------------------------------|------------|
|                            |             |            | Hazard ratio                   | 95% CI     | Hazard ratio                                     | 95% CI     |
| Quartile 1                 | 547         | 10.0       | 1                              | Referent   | 1                                                | Referent   |
| Quartile 2                 | 544         | 20.9       | 2.10                           | 1.47, 3.02 | 2.05                                             | 1.44, 2.92 |
| Quartile 3                 | 556         | 16.8       | 1.69                           | 1.16, 2.45 | 1.64                                             | 1.11, 2.43 |
| Quartile 4                 | 553         | 22.9       | 2.28                           | 1.63, 3.19 | 2.18                                             | 1.51, 3.16 |
| P for trend                |             |            | 0.0003                         |            | 0.0035                                           |            |
| Log BPA                    | 2200        | 17.7       | 1.23                           | 1.12, 1.35 | 1.20                                             | 1.07, 1.33 |

Abbreviations: BPA, Urinary bisphenol A; CI, confidence interval

<sup>a</sup> BPA quartiles: quartile 1 (<1.5 ng/mL), quartile 2 (1.5-2.7 ng/mL), quartile 3 (2.8-5.4 ng/mL), quartile 4 (>5.4 ng/mL)

<sup>b</sup> Adjusted for age (years), sex (boys, girls), race-ethnicity (non-Hispanic white, non-Hispanic black, Mexican American, other), education (below high school, high school, above high school), moderate activity (absent, present), urinary creatinine (mg/dL), and serum cotinine (ng/mL).

Web Table 7. Descriptive statistics for age, urinary BPA, and BMI by groups, National Health and Nutrition Examination Survey, 2003–2008

|                               | Girls                  |                    | Boys                   |                    |
|-------------------------------|------------------------|--------------------|------------------------|--------------------|
|                               | Non-white<br>Mean (SE) | White<br>Mean (SE) | Non-white<br>Mean (SE) | White<br>Mean (SE) |
| No.                           | 779                    | 305                | 797                    | 319                |
| Age, years                    | 12.0 (0.2)             | 12.7 (0.2)         | 12.1 (0.2)             | 12.4 (0.2)         |
| BPA, ng/mL                    | 4.6 (0.3)              | 4.5 (0.3)          | 5.1 (0.4)              | 5.0 (0.5)          |
| BMI, kg/m <sup>2</sup>        | 22.0 (0.3)             | 21.1 (0.3)         | 21.2 (0.3)             | 21.1 (0.2)         |
| Z-score for BMI index-for-age | 0.6 (0.05)             | 0.4 (0.06)         | 0.5 (0.06)             | 0.5 (0.07)         |

Abbreviations: BPA, Urinary bisphenol A; BMI, Body mass index; SE, Standard error
